# Supplementary material
Source: PubMed Central journal article supplement (PMC8631601)
Supplement: jci-131-151347-s122.pdf [file jci-131-151347-s122.pdf]

## Supplemental File I: Gene sets for cluster determination

| Geneset_name                                                         | Genes used for identification of cell types                                                                                                                                                                                                                                                                                                                                                                                                                                                                  |
|----------------------------------------------------------------------|--------------------------------------------------------------------------------------------------------------------------------------------------------------------------------------------------------------------------------------------------------------------------------------------------------------------------------------------------------------------------------------------------------------------------------------------------------------------------------------------------------------|
| IMMUNE_Bindea_Cell_aDC_Median_Immunity.2013_Pmid.24138885            | Ido1, Oas3, Ccl1, Ebi3, Lamp3                                                                                                                                                                                                                                                                                                                                                                                                                                                                                |
| IMMUNE_Bindea_Cell_Bcells_Median_Immunity.2013_Pmid.24138885         | Tnfrsf17, Blk, Cd19, Ms4a1, Cd72, Cr2, Coch, Dtnb, Glc, Gng7, H2-Ob, H2-Aa, Mef2c, Abcb4, Pnoc, Scn3a, Slc15a2, Spib, Tc1, Ccr9, Blnk, Bcl11a, Qrs1, Mical3, Bach2, Osbp10                                                                                                                                                                                                                                                                                                                                   |
| IMMUNE_Bindea_Cell_DC_Median_Immunity.2013_Pmid.24138885             | Hsd11b1, Npr1, Ccl2, Ccl17, Ccl22, Ppfibp2, Cd209e<br>Blvrb, Csf1r, Ctms, F13a1, Fabp4, Fzd2, Guca1a, Tacstd2, Mmp12,                                                                                                                                                                                                                                                                                                                                                                                        |
| IMMUNE_Bindea_Cell_iDC_Median_Immunity.2013_Pmid.24138885            | Pparg, Prep, Rap1gap, Pdxk, Ch25h, Abcg2, Hs3st2, Clec10a, Vash1, Slc7a8, Syt17, Nudt9, Card9, Ms4a6d, Slc26a6, Dcstamp, Lman2l<br>Apoe, Bcat1, Scarb2, Cd68, Chil1, Chit1, Col8a2, Cybb, Emp1, Fdx1, Gpc4, Fn1, Gm2a, Me1, Msr1, Ptgs2, Scg5, Sult1c2, Marco, Cd84,                                                                                                                                                                                                                                         |
| IMMUNE_Bindea_Cell_Macrophages_Median_Immunity.2013_Pmid.24138885    | Cd163, Atg7, Clec5a, Rai14, Pcolce2, Ms4a4a, Dnase2b, Colec12, Sgms1, Ctsk                                                                                                                                                                                                                                                                                                                                                                                                                                   |
| IMMUNE_Bindea_Cell_Mastcells_Median_Immunity.2013_Pmid.24138885      | Adcyap1, Nr0b1, Calb2, Cma1, Cpa3, Ctsg, Elane, Ms4a2, Gata2, Hdc, Hpgd, Kit, Vwa5a, Mpo, Prg2, Ptgs1, Slc18a2, Tal1, Tpsb2, Scg2, Abcc4, Hpgds, Slc24a3, Ppm1h, Tpsb2, Mlph, Maob<br>Alpl, Bst1, Csf3r, Fcgr4, Fpr1, Fpr2, Cxcr1, Cxcr2, Kcnj15, Cyp4f13,                                                                                                                                                                                                                                                   |
| IMMUNE_Bindea_Cell_Neutrophils_Median_Immunity.2013_Pmid.24138885    | Mme, Pde4b, Slc22a4, Dysf, H2bc8, Mgam, Creb5, Tecpr2, Hpse, Cd93, G0s2, Slc25a37, Cpped1, Crispld2                                                                                                                                                                                                                                                                                                                                                                                                          |
| IMMUNE_Bindea_Cell_NKcells_Median_Immunity.2013_Pmid.24138885        | Adarb1, Aldh1b1, Apbb2, Bcl2, Cdc5l, Gnas, Igfbp5, Psmd4, Xcl1, Spn, Tbx2r, Zfp13, Pdlim4, Fgf18, Mcm3ap, Ncr1, Mrc2, Ldb3, Mapre3, Kank2, Fzr1, Trpv6, Ppp4r3a, Prx, Tinagl1, At12, Slc30a5, Tctn2, Sgms1                                                                                                                                                                                                                                                                                                   |
| IMMUNE_Bindea_Cell_pDC_Median_Immunity.2013_Pmid.24138885            | Il3ra                                                                                                                                                                                                                                                                                                                                                                                                                                                                                                        |
| IMMUNE_Bindea_Cell_Tcells_Median_Immunity.2013_Pmid.24138885         | Cd2, Cd3d, Cd3e, Cd3g, Cd6, Cd28, Lck, Sh2d1a, Prkcq, Skap1, Itm2a, Cd96, Trat1, Bcl11b, Ncald                                                                                                                                                                                                                                                                                                                                                                                                               |
| IMMUNE_Bindea_Cell_T helper cells_Median_Immunity.2013_Pmid.24138885 | Cd28, Lrba, Atf2, Nap1l4, Rpa1, Ube2l3, Slc25a12, Itm2a, Sec24c, Batf, Yme1l1, Srsf10, Asf1a, Icos, Phf10, Nup107, Fam111a, Ddx50, Bora, Fryl<br>Vpreb3, Tnfrsf17, Tc1, Spib, Rnase6, Rasgrp3, Ralgs2, Pnoc, P2ry14, P2rx5, Ms4a1, H2-Aa, H2-Ob, Hhex, Gng7, Fcgr2b, Fcer2a, Eaf2, Cxcr5, Cr2, Cd79b, Cd79a, Cd72, Cd40, Cd37, Cd22, Cd19, Cd180, Blk, Bcl7a, Bank1, Bach2, Alox5, Adam28, Abcb4<br>Tnfrsf17, Tnfrsf13b, Pou2af1, Pax5, Ms4a1, Fcrla, Fcrl5, Fcrl1, Fcer2a, Cxcr5, Cd79b, Cd79a, Cd19, Bank1 |
| B-cell_ASH                                                           |                                                                                                                                                                                                                                                                                                                                                                                                                                                                                                              |
| B-cell_PEROU                                                         |                                                                                                                                                                                                                                                                                                                                                                                                                                                                                                              |

Vpreb3, Tnfrsf17, Tnfrsf13b, Tcl1, Tcf4, Syk, Spib, Rnase6, Rasgrp3, Ralgps2, Pou2af1, Pnoc, Pax5, P2ry14, P2rx5, Ms4a1, H2-Ea-ps, H2-Ab1, H2-Aa, H2-Ob, Hhex, Gng7, Gga2, Fcrla, Fcrl5, Fcrl1, Fcgr2b, Fcer2a, Ebf1, Eaf2, Cxcr5, Cr2, Cd79b, Cd79a, Cd74, Cd72, Cd40, Cd37, Cd22, Cd19, Cd180, Blnk, Blk, Bcl7a, Bcl11a, Bank1, Bach2, Alox5, Aff3, Adam28, Abcb4

B-cell\_IMMGEN

Vpreb3, Tnfrsf17, Tcl1, Tcf4, Spib, Pou2af1, Pnoc, Pax5, P2rx5, H2-Ea-ps, H2-Ab1, H2-Aa, Fcrla, Fcer2a, Ebf1, Cd79a, Cd72, Cd40, Cd22, Cd19, Blnk, Blk, Bcl11a, Bank1

B-cell\_PURVESH

Zap70, Ubash3a, Trat1, Tnfrsf4, Tnfrsf14, St8sia1, Sit1, Sh2d1a, Ptgir, Ptger2, Prf1, Pdc1, Nkg7, Map4k1, Ly9, Lta, Lef1, Lck, Lat, Klrg1, Klrd1, Klrb1a, Itk, Il7r, Il2ra, Il21, Il18rap, Icos, Gzmm, Gzmd, Gzma, Gpr171, Gfi1, Foxp3, Flt3l, Dusp2, Dsc1, Dgka, Cxcr6, Ctsw, Ctla4, Cst7, Crtam, Cd96, Cd8a, Cd7, Cd6, Cd5, Cd40lg, Cd4, Cd3g, Cd3e, Cd3d, Cd300a, Cd28, Cd247, Cd244a, Cd2, Cd160, Ccr7, Ccr5, Ccnd2, Ccl5, Ccl4, Bcl2a1a, Bcl11b, Ankrd55, Acap1

T-cell\_ASH

Zap70, Ubash3a, Trat1, Tigit, Themis, Tbx21, Spock2, Slamf1, Sla2, Sit1, Sh2d1a, Samd3, Prf1, Pdc1, Nkg7, Map4k1, Ly9, Lta, Lck, Lat, Itk, Icos, Gzmm, Gzmk, Gzma, Gpr171, Gfi1, Cxcr6, Cxcr3, Ctla4, Cst7, Crtam, Cd96, Cd8a, Cd7, Cd6, Cd5, Cd40lg, Cd3g, Cd3e, Cd3d, Cd27, Cd247, Cd2, Ccr2, Ccl5, Acap1

T-cell\_PEROU

Zap70, Ubash3a, Trat1, Tnfrsf4, Tnfrsf25, Tnfrsf14, Tigit, Themis, Tbx21, St8sia1, Spock2, Slamf1, Sla2, Sh2d1a, Samd3, Ptgir, Ptger2, Prf1, Pdc1, Nr3c2, Nosip, Nkg7, Mal, Lrrn3, Lef1, Ldlrap1, Lck, Lat, Klrg1, Klrd1, Klrb1a, Itk, Il7r, Il2ra, Il21, Il18rap, Icos, Gzmk, Gzmd, Gzma, Gpr171, Gfi1, Foxp3, Flt3l, Fbln5, Ephx2, Ephb6, Dusp2, Dsc1, Dgka, Cxcr6, Cxcr3, Ctsw, Ctla4, Cst7, Crtam, Cish, Cdr2, Cd96, Cd8a, Cd7, Cd6, Cd5, Cd40lg, Cd4, Cd3g, Cd3e, Cd3d, Cd300a, Cd28, Cd27, Cd247, Cd244a, Cd2, Cd160, Ccr7, Ccr5, Ccr4, Ccr2, Ccnd2, Ccl5, Ccl4, Bcl2a1a, Bcl11b, Ankrd55

T-cell\_IMMGEN

Ubash3a, Tnfrsf25, Themis, Nr3c2, Nosip, Mal, Lrrn3, Lef1, Ldlrap1, Il7r, Icos, Fbln5, Ephx2, Ephb6, Cish, Cdr2, Cd6, Cd5, Cd40lg, Cd3g, Cd3e, Ccr4

T-cell\_PURVESH
