# Supplementary material
Source: PubMed Central journal article supplement (PMC8631601)
Supplement: jci-131-151347-s123.pdf [file jci-131-151347-s123.pdf]

## Supplemental File II E2\_up and down regulated DEG in CD68+ cells

## Genes Downregulated upon E2-treatment

|           | p_val    | avg_logFC | pct.1 | pct.2 | p_val_adj |
|-----------|----------|-----------|-------|-------|-----------|
| Gm42418   | 4.01E-99 | -0.30987  | 1     | 1     | 1.92E-94  |
| Pabpc1    | 3.29E-61 | -0.30645  | 0.986 | 0.977 | 1.57E-56  |
| Ifi202b   | 9.77E-56 | -0.45888  | 0.255 | 0.511 | 4.66E-51  |
| Rpl23a    | 2.64E-52 | -0.33947  | 0.912 | 0.936 | 1.26E-47  |
| Clec7a    | 4.90E-48 | -0.68226  | 0.765 | 0.877 | 2.34E-43  |
| Prkcd     | 8.90E-46 | -0.4952   | 0.865 | 0.921 | 4.25E-41  |
| Qsox1     | 7.86E-43 | -0.29814  | 0.152 | 0.348 | 3.75E-38  |
| Ywhaz     | 2.14E-40 | -0.34652  | 0.881 | 0.923 | 1.02E-35  |
| Mir6236   | 8.77E-38 | -0.47949  | 0.909 | 0.932 | 4.18E-33  |
| Arg1      | 6.62E-30 | -1.49079  | 0.121 | 0.268 | 3.16E-25  |
| Gm13339   | 2.23E-28 | -0.32348  | 0.692 | 0.769 | 1.07E-23  |
| Hnrnpa2b1 | 6.74E-27 | -0.25075  | 0.936 | 0.934 | 3.22E-22  |
| Ddx3x     | 1.10E-26 | -0.26479  | 0.832 | 0.882 | 5.27E-22  |
| Lcp1      | 1.56E-26 | -0.27897  | 0.961 | 0.965 | 7.43E-22  |
| Cd44      | 2.53E-25 | -0.36365  | 0.825 | 0.883 | 1.21E-20  |
| Dazap2    | 6.58E-25 | -0.25305  | 0.897 | 0.933 | 3.14E-20  |
| Rnf19b    | 1.65E-24 | -0.40714  | 0.455 | 0.593 | 7.88E-20  |
| Arl4c     | 2.26E-24 | -0.32545  | 0.817 | 0.853 | 1.08E-19  |
| Rbms1     | 4.29E-24 | -0.30603  | 0.862 | 0.881 | 2.05E-19  |
| Bhlhe40   | 1.05E-23 | -0.42137  | 0.388 | 0.543 | 5.00E-19  |
| Cbl       | 1.81E-23 | -0.25872  | 0.753 | 0.819 | 8.63E-19  |
| Actg1     | 3.24E-23 | -0.27253  | 0.997 | 0.991 | 1.55E-18  |
| Lars2     | 3.72E-23 | -0.27375  | 0.816 | 0.854 | 1.77E-18  |
| Hk2       | 2.20E-22 | -0.31606  | 0.59  | 0.7   | 1.05E-17  |
| Cdh1      | 2.81E-22 | -0.46823  | 0.065 | 0.17  | 1.34E-17  |
| Ass1      | 2.88E-21 | -0.29806  | 0.125 | 0.251 | 1.38E-16  |
| Cd53      | 9.47E-21 | -0.28312  | 0.925 | 0.93  | 4.52E-16  |
| Hnrnpu    | 9.81E-21 | -0.2502   | 0.656 | 0.745 | 4.68E-16  |
| Zeb2      | 4.16E-19 | -0.27039  | 0.953 | 0.949 | 1.98E-14  |
| Malt1     | 4.79E-19 | -0.44968  | 0.255 | 0.383 | 2.28E-14  |
| Rbbp6     | 8.16E-19 | -0.26927  | 0.585 | 0.68  | 3.90E-14  |
| Tes       | 2.93E-18 | -0.26628  | 0.253 | 0.379 | 1.40E-13  |
| AA467197  | 9.88E-18 | -1.1474   | 0.121 | 0.23  | 4.72E-13  |
| Hexim1    | 1.18E-16 | -0.25983  | 0.511 | 0.621 | 5.63E-12  |
| Adam8     | 1.26E-16 | -0.53147  | 0.345 | 0.462 | 6.02E-12  |
| Plek      | 2.00E-16 | -0.31211  | 0.837 | 0.87  | 9.57E-12  |
| Jak2      | 8.82E-16 | -0.32942  | 0.364 | 0.474 | 4.21E-11  |
| Zfp36l2   | 1.44E-14 | -0.27323  | 0.941 | 0.9   | 6.87E-10  |
| Ccl24     | 3.00E-14 | -1.19584  | 0.13  | 0.227 | 1.43E-09  |
| Slc7a11   | 3.97E-14 | -0.38456  | 0.161 | 0.265 | 1.90E-09  |
| Tapbp     | 2.06E-13 | -0.25423  | 0.786 | 0.829 | 9.83E-09  |
| Epb41l2   | 2.70E-13 | -0.26678  | 0.426 | 0.525 | 1.29E-08  |
| Rbpj      | 3.18E-13 | -0.2858   | 0.733 | 0.782 | 1.52E-08  |
| Havcr2    | 3.54E-13 | -0.27376  | 0.287 | 0.388 | 1.69E-08  |

|         |          |          |       |       |          |
|---------|----------|----------|-------|-------|----------|
| B4galt1 | 6.35E-13 | -0.25928 | 0.474 | 0.566 | 3.03E-08 |
| Nfkb1   | 9.03E-13 | -0.31868 | 0.72  | 0.769 | 4.31E-08 |
| Cish    | 1.09E-12 | -0.28776 | 0.157 | 0.255 | 5.21E-08 |
| Hif1a   | 1.10E-12 | -0.30163 | 0.688 | 0.725 | 5.24E-08 |
| N4bp1   | 1.71E-12 | -0.27229 | 0.514 | 0.6   | 8.15E-08 |
| Cox17   | 7.12E-12 | -0.25158 | 0.802 | 0.814 | 3.40E-07 |
| Ero1l   | 8.97E-12 | -0.36815 | 0.267 | 0.36  | 4.28E-07 |
| Tgfb1   | 9.25E-12 | -0.28736 | 0.959 | 0.941 | 4.42E-07 |
| Etv3    | 1.07E-11 | -0.25332 | 0.439 | 0.54  | 5.11E-07 |
| Mmp14   | 3.05E-11 | -0.42337 | 0.292 | 0.385 | 1.46E-06 |
| Rgcc    | 4.49E-11 | -0.33561 | 0.197 | 0.295 | 2.14E-06 |
| Slc7a2  | 1.60E-10 | -0.45817 | 0.073 | 0.141 | 7.64E-06 |
| Hbegf   | 1.88E-10 | -0.28825 | 0.052 | 0.111 | 8.96E-06 |
| Rhob    | 9.86E-10 | -0.34427 | 0.416 | 0.499 | 4.71E-05 |
| Dusp5   | 1.08E-09 | -0.26439 | 0.391 | 0.478 | 5.17E-05 |
| Nampt   | 1.54E-09 | -0.25391 | 0.404 | 0.478 | 7.35E-05 |
| Csrnp1  | 1.87E-09 | -0.27956 | 0.541 | 0.609 | 8.91E-05 |
| Slc2a1  | 3.02E-09 | -0.27258 | 0.302 | 0.377 | 0.000144 |
| Mafb    | 4.04E-09 | -0.27317 | 0.811 | 0.842 | 0.000193 |
| Il1rn   | 1.92E-08 | -0.70865 | 0.284 | 0.356 | 0.000918 |
| Itgax   | 6.41E-08 | -0.27182 | 0.229 | 0.308 | 0.003058 |
| Scd2    | 1.30E-07 | -0.32672 | 0.309 | 0.377 | 0.006206 |
| Smox    | 7.56E-07 | -0.27427 | 0.307 | 0.373 | 0.036086 |
| Fam129b | 1.02E-06 | -0.27316 | 0.488 | 0.537 | 0.048555 |
| Clic4   | 1.16E-06 | -0.28359 | 0.512 | 0.563 | 0.055551 |
| Hilpda  | 3.80E-06 | -0.38177 | 0.159 | 0.218 | 0.181233 |
| Bnip3   | 4.87E-06 | -0.32411 | 0.224 | 0.28  | 0.232537 |
| Gatm    | 9.90E-06 | -0.47277 | 0.389 | 0.436 | 0.472454 |
| Retnla  | 0.000216 | -1.01252 | 0.114 | 0.157 | 1        |
| Sdc4    | 0.000116 | -0.57293 | 0.422 | 0.442 | 1        |
| Spp1    | 0.012489 | -0.53669 | 0.241 | 0.2   | 1        |
| Timp1   | 0.109847 | -0.39221 | 0.102 | 0.118 | 1        |
| Srgn    | 0.003933 | -0.37507 | 0.956 | 0.938 | 1        |
| Slpi    | 0.760551 | -0.36953 | 0.251 | 0.248 | 1        |
| Tgm2    | 0.003778 | -0.34501 | 0.525 | 0.539 | 1        |
| Id2     | 0.000906 | -0.32347 | 0.497 | 0.526 | 1        |
| Lyz1    | 0.802287 | -0.31085 | 0.11  | 0.109 | 1        |
| Cxcl2   | 0.080087 | -0.31077 | 0.436 | 0.396 | 1        |
| Emp1    | 0.007151 | -0.30161 | 0.245 | 0.278 | 1        |
| Ighm    | 0.005633 | -0.26937 | 0.449 | 0.478 | 1        |
| Errfi1  | 0.007164 | -0.26125 | 0.333 | 0.362 | 1        |
| Ptgs2   | 0.418583 | -0.2589  | 0.281 | 0.294 | 1        |
| Grina   | 0.040204 | -0.25269 | 0.609 | 0.597 | 1        |

Genes up-regulated upon E2-treatment

|        | p_val    | avg_logFC | pct.1 | pct.2 | p_val_adj |
|--------|----------|-----------|-------|-------|-----------|
| Fcer1g | 1.70E-73 | 0.313666  | 0.991 | 0.959 | 8.12E-69  |
| Rps20  | 3.20E-71 | 0.292162  | 0.988 | 0.963 | 1.53E-66  |

|          |          |          |       |       |          |
|----------|----------|----------|-------|-------|----------|
| Rplp0    | 3.21E-70 | 0.333023 | 0.988 | 0.963 | 1.53E-65 |
| Gm10076  | 3.18E-66 | 0.375729 | 0.776 | 0.536 | 1.52E-61 |
| Cst3     | 2.22E-63 | 0.344584 | 0.993 | 0.974 | 1.06E-58 |
| Rpl9     | 2.26E-55 | 0.258515 | 0.99  | 0.967 | 1.08E-50 |
| Rps11    | 9.76E-55 | 0.270445 | 0.992 | 0.967 | 4.66E-50 |
| Itm2b    | 2.29E-51 | 0.410393 | 0.988 | 0.955 | 1.09E-46 |
| Rps2     | 2.13E-46 | 0.274231 | 0.982 | 0.947 | 1.02E-41 |
| Rpl3     | 7.06E-45 | 0.277989 | 0.983 | 0.947 | 3.37E-40 |
| Rpl29    | 1.93E-44 | 0.254772 | 0.981 | 0.939 | 9.21E-40 |
| Rpl21    | 4.96E-43 | 0.256687 | 0.975 | 0.93  | 2.37E-38 |
| Hint1    | 9.37E-43 | 0.254822 | 0.949 | 0.886 | 4.47E-38 |
| H2-D1    | 1.74E-42 | 0.280774 | 0.993 | 0.978 | 8.30E-38 |
| Ifitm2   | 7.32E-42 | 0.373988 | 0.963 | 0.892 | 3.50E-37 |
| Dpep2    | 7.61E-41 | 0.372547 | 0.635 | 0.403 | 3.63E-36 |
| Chil3    | 1.08E-36 | 1.252599 | 0.497 | 0.324 | 5.15E-32 |
| Thbs1    | 1.21E-36 | 0.31892  | 0.754 | 0.55  | 5.79E-32 |
| Trem2    | 2.05E-36 | 0.483108 | 0.736 | 0.547 | 9.79E-32 |
| Cd48     | 8.60E-33 | 0.271492 | 0.77  | 0.586 | 4.11E-28 |
| Gm10222  | 1.08E-31 | 0.257707 | 0.924 | 0.838 | 5.14E-27 |
| Apoe     | 5.96E-29 | 0.56897  | 0.91  | 0.834 | 2.85E-24 |
| Ifi27l2a | 5.41E-28 | 0.524508 | 0.832 | 0.734 | 2.58E-23 |
| Tspo     | 2.97E-26 | 0.26039  | 0.949 | 0.888 | 1.42E-21 |
| Al607873 | 3.82E-26 | 0.278624 | 0.669 | 0.487 | 1.82E-21 |
| Ckb      | 6.26E-26 | 0.284662 | 0.544 | 0.351 | 2.99E-21 |
| Fcrls    | 1.22E-25 | 0.563825 | 0.363 | 0.181 | 5.82E-21 |
| Tmem176f | 1.42E-24 | 0.320935 | 0.827 | 0.711 | 6.76E-20 |
| Bst2     | 4.38E-23 | 0.296136 | 0.727 | 0.565 | 2.09E-18 |
| Itga6    | 6.45E-23 | 0.343685 | 0.427 | 0.257 | 3.08E-18 |
| Lyz2     | 2.71E-22 | 0.288498 | 0.987 | 0.972 | 1.30E-17 |
| Tmem176a | 6.13E-22 | 0.339366 | 0.755 | 0.63  | 2.93E-17 |
| AF251705 | 9.56E-22 | 0.263936 | 0.862 | 0.744 | 4.56E-17 |
| Mt1      | 2.24E-21 | 0.400572 | 0.67  | 0.527 | 1.07E-16 |
| Gdf3     | 2.69E-21 | 0.285113 | 0.193 | 0.064 | 1.28E-16 |
| Lrg1     | 3.40E-21 | 0.366331 | 0.15  | 0.036 | 1.62E-16 |
| Rgs10    | 3.29E-20 | 0.259922 | 0.766 | 0.656 | 1.57E-15 |
| Mgl2     | 7.17E-20 | 0.57124  | 0.391 | 0.227 | 3.42E-15 |
| Cfh      | 1.63E-16 | 0.262516 | 0.393 | 0.245 | 7.79E-12 |
| Arl5c    | 1.13E-12 | 0.265557 | 0.482 | 0.368 | 5.38E-08 |
| Cd14     | 3.49E-12 | 0.271502 | 0.86  | 0.788 | 1.66E-07 |
| Pf4      | 3.97E-12 | 0.471453 | 0.32  | 0.204 | 1.89E-07 |
| C1qb     | 4.94E-12 | 0.518768 | 0.516 | 0.428 | 2.36E-07 |
| Ifitm3   | 2.23E-10 | 0.27548  | 0.91  | 0.856 | 1.07E-05 |
| Ccrl2    | 5.20E-10 | 0.32632  | 0.383 | 0.284 | 2.48E-05 |
| C1qa     | 4.09E-09 | 0.42138  | 0.468 | 0.372 | 0.000195 |
| C1qc     | 8.10E-09 | 0.420775 | 0.484 | 0.397 | 0.000387 |
| Id3      | 1.63E-08 | 0.269949 | 0.281 | 0.191 | 0.00078  |
| Ly6c2    | 0.312581 | 0.265697 | 0.364 | 0.377 | 1        |

|        |          |          |       |       |   |
|--------|----------|----------|-------|-------|---|
| S100a8 | 9.16E-05 | 0.785754 | 0.138 | 0.088 | 1 |
|--------|----------|----------|-------|-------|---|
